# Supplementary material
Source: HighWire-hosted journal article supplement (https://www.cancerbiomed.org/content/21/2/175)
Supplement: media-1 [file media-1.pdf]

## Supplementary materials

**Table S1** Sequences of primer sets used in qRT-PCR

| Gene            | Sequence (5'-3')                 |
|-----------------|----------------------------------|
| <i>mCcl5</i>    | forward, TTTGCCTACCTCTCCCTCG     |
|                 | reverse, CGACTGCAAGATTGGAGCACT   |
| <i>mCcl2</i>    | forward, TAAAAACCTGGATCGGAACCAAA |
|                 | reverse, GCATTAGCTTCAGATTACGGGT  |
| <i>mMmp-9</i>   | forward, ATAGAGGAAGCCCATTACAGG   |
|                 | reverse, GTGTACACCCACATTTGACG    |
| <i>mArg-1</i>   | forward, CAATGAAGAGCTGGCTGGTGT   |
|                 | reverse, GTGTGAGCATCCACCCAAATG   |
| <i>mCxcr4</i>   | forward, GACTGGCATAGTCGGCAATG    |
|                 | reverse, AGAAGGGGAGTGTGATGACAAA  |
| <i>mVegf</i>    | forward, GCACATAGAGAGAATGAGCTTCC |
|                 | reverse, CTCCGCTCTGAACAAGGCT     |
| <i>mβ-actin</i> | forward, GGCTGTATCCCCTCCATCG     |
|                 | reverse, CCAGTTGGTAACAATGCCATGT  |
| <i>hCcl5</i>    | forward, TACCATGAAGGTCTCCGC      |
|                 | reverse, GACAAAGACGACTGCTGG      |
| <i>hCcl2</i>    | forward, AAGATCTCAGTGCAGAGGCTCG  |
|                 | reverse, TTGCTTGCCAGGTGGTCCAT    |
| <i>hMmp-9</i>   | forward, GGGACGCAGACATCGTCATC    |
|                 | reverse, TCGTCATCGTCGAAATGGGC    |
| <i>hArg-1</i>   | forward, TGGACAGACTAGGAATTGGCA   |
|                 | reverse, CCAGTCCGTCAACATCAAACT   |
| <i>hCxcr4</i>   | forward, ACTACACCGAGGAAATGGGCT   |
|                 | reverse, CCCACAATGCCAGTTAAGAAGA  |
| <i>hVegf</i>    | forward, TTGCCTTGCTGCTACCTC      |
|                 | reverse, GTGATGATTGCTCCCTCTCTC   |
| <i>hβ-actin</i> | forward, TGAAGTGTGACGTGGACATA    |
|                 | reverse, GGAGGAGCAATGATCTTGAT    |

**Table S2** The lists of PARP-1 binding proteins identified by IP/MS

| Gene names                                                            | Intensity 1-IgG | Intensity 2-Ctrl | Intensity 3-A549 |
|-----------------------------------------------------------------------|-----------------|------------------|------------------|
| MYH9                                                                  | 498700000       | 460680000        | 513360000        |
| PARP1                                                                 | 0               | 1256600000       | 1158400000       |
| DSP                                                                   | 20713000        | 2337100          | 47391000         |
| ACTB;ACTG2;ACTA2                                                      | 295670000       | 275770000        | 804250000        |
| ACTG1                                                                 | 0               | 0                | 10503000         |
| PKM                                                                   | 62675000        | 33386000         | 57471000         |
| ZYX                                                                   | 0               | 417530000        | 433190000        |
| GAPDH                                                                 | 134540000       | 373240000        | 237870000        |
| HIST1H2BK;H2BFS                                                       | 2854500         | 0                | 0                |
| HIST1H4A                                                              | 271730000       | 56486000         | 137940000        |
| HIST1H2BC;HIST1H2BM;HIST1H2BN;HIST1H2BH;HIST2H2BF;HIST1H2BD;HIST1H2BL | 712130000       | 105850000        | 211400000        |
| HIST1H1C                                                              | 799740000       | 106660000        | 98439000         |
| ACTA1;ACTC1                                                           | 29662000        | 0                | 60537000         |
| HIST1H1E;HIST1H1D;HIST1H1A                                            | 16332000        | 52472000         | 60740000         |
| JUP                                                                   | 11250000        | 1180200          | 22664000         |
| HIST2H2BE;HIST1H2BB;HIST1H2BO                                         | 9145000         | 1280900          | 10971000         |
| ENO1                                                                  | 4348800         | 0                | 24403000         |
| HIST1H1B                                                              | 274540000       | 85963000         | 61872000         |
| PPIA                                                                  | 55839000        | 34574000         | 43085000         |
| HIST1H2AH;HIST1H2AG;HIST1H2AJ;H2AFJ;HIST1H2AD;H2AFX                   | 376490000       | 66071000         | 147480000        |
| LMNB1                                                                 | 16115000        | 4169800          | 3770200          |
| RPL13                                                                 | 35864000        | 12043000         | 40298000         |
| RPS16                                                                 | 9835200         | 12017000         | 28750000         |
| EEF1A1;EEF1A1P5;EEF1A2                                                | 43373000        | 22541000         | 110300000        |
| HIST1H3A;HIST2H3A;HIST3H3;H3F3A;H3F3C                                 | 329290000       | 28786000         | 134710000        |
| PRDX1                                                                 | 8621500         | 3836300          | 56034000         |
| LASP1                                                                 | 30933000        | 26832000         | 52871000         |
| ZNF318                                                                | 0               | 4200000          | 10910000         |
| HIST1H2AC;HIST3H2A;HIST1H2AB                                          | 47205000        | 6466600          | 7647900          |
| MYO1G                                                                 | 0               | 5550800          | 19121000         |
| NCF1;NCF1B;NCF1C                                                      | 18045000        | 10411000         | 20283000         |
| CFL1                                                                  | 1567600         | 15047000         | 16183000         |
| GRN                                                                   | 35377000        | 12720000         | 14879000         |
| MYL6                                                                  | 58690000        | 49277000         | 63457000         |
| RPS20                                                                 | 42359000        | 28760000         | 17766000         |

Table S2 Continued

| Gene names                        | Intensity 1-IgG | Intensity 2-Ctrl | Intensity 3-A549 |
|-----------------------------------|-----------------|------------------|------------------|
| RPS13                             | 19135000        | 9317700          | 13628000         |
| RPS6                              | 12698000        | 6845900          | 6058600          |
| TUBA1C;TUBA1B;TUBA1A;TUBA4A;TUBA8 | 3829400         | 5481200          | 22869000         |
| KPRP                              | 4375600         | 0                | 8978200          |
| HIST2H2AA3;HIST2H2AC              | 21796000        | 1298000          | 8163600          |
| HSPA8                             | 8192700         | 6677600          | 16021000         |
| HSPA9                             | 8219700         | 2990700          | 9205300          |
| RPL35                             | 41613000        | 13928000         | 43623000         |
| LIG3                              | 0               | 1649300          | 10340000         |
| HNRNPM                            | 10547000        | 3519400          | 13005000         |
| TRIM21                            | 0               | 10017000         | 11786000         |
| CSRP1                             | 0               | 14933000         | 26476000         |
| RPS14                             | 5845100         | 7249100          | 20018000         |
| RPS18                             | 10839000        | 9795100          | 9104600          |
| RPS4X                             | 7999300         | 7677400          | 8930000          |
| GNB2L1                            | 4140200         | 5666800          | 5552100          |
| NPM1                              | 4721900         | 4697300          | 8598400          |
| TPM3                              | 11692000        | 0                | 10462000         |
| RPL4                              | 4285100         | 2529700          | 7638900          |
| RPL27A                            | 16897000        | 30613000         | 19466000         |
| RPS9                              | 4997200         | 2504000          | 4788000          |
| RPS3A                             | 3680700         | 4374700          | 8410100          |
| RPS23                             | 8054500         | 6146200          | 10738000         |
| RPS11                             | 9411300         | 3589700          | 15688000         |
| RPS28                             | 31978000        | 14092000         | 45121000         |
| RPL32                             | 12036000        | 9023800          | 18993000         |
| TUBB4B;TUBB;TUBB4A;TUBB2B;TUBB2A  | 0               | 4889800          | 3198100          |
| RPL19                             | 6267200         | 5936900          | 5332800          |
| DSG1                              | 9703300         | 0                | 5432900          |
| RPL18                             | 4611700         | 7624300          | 10762000         |
| HIST2H2AB                         | 4011300         | 0                | 0                |
| SERPINA1                          | 20123000        | 0                | 0                |
| GH2;GH1;CSH2;CSH1;CSHL1           | 7661500         | 2899400          | 2186200          |
| H2AFV;H2AFZ                       | 19471000        | 0                | 2807400          |
| RPL7                              | 2630200         | 1828300          | 0                |

Table S2 Continued

| Gene names      | Intensity 1-IgG | Intensity 2-Ctrl | Intensity 3-A549 |
|-----------------|-----------------|------------------|------------------|
| RPL30           | 6014600         | 0                | 6245200          |
| RPL6            | 0               | 0                | 17959000         |
| DSC1            | 3519500         | 0                | 1146500          |
| SERBP1          | 0               | 2094600          | 6381100          |
| RCC2            | 8517000         | 6239500          | 2263600          |
| C11orf98        | 2303600         | 0                | 877290           |
| LMNA            | 1277200         | 0                | 3145800          |
| VIM             | 854360          | 0                | 3576700          |
| HSPA5           | 4804900         | 4989000          | 4887200          |
| DDX5            | 1245800         | 781670           | 1274100          |
| RPL17           | 0               | 3433500          | 2148000          |
| XRCC1           | 0               | 516290           | 4140000          |
| PCMT1           | 2366500         | 1808100          | 5766900          |
| PPIB            | 4467200         | 0                | 2404600          |
| MSN             | 3202300         | 0                | 518220           |
| PTPN6           | 0               | 0                | 4911700          |
| HNRNPH1;HNRNPH2 | 0               | 1098900          | 1977600          |
| STIP1           | 0               | 917910           | 998650           |
| RPL9            | 6973400         | 0                | 4882300          |
| LSP1            | 4286900         | 1126800          | 6636000          |
| RPL3            | 2102800         | 4259700          | 3336200          |
| RPL28           | 5793500         | 3490700          | 5923100          |
| RPL29           | 30450000        | 0                | 0                |
| TUFM            | 0               | 830720           | 3057300          |
| LYZ             | 3035000         | 5123800          | 2105000          |
| HNRNPK          | 1711500         | 883140           | 1420300          |
| RPS8            | 4551400         | 5114500          | 5769100          |
| RPS29           | 6926800         | 6514100          | 0                |
| RPL11           | 4640400         | 0                | 2710800          |
| RPL8            | 2570300         | 5674000          | 1378900          |
| DCD             | 3994800         | 3632200          | 813760           |
| RPL36AL;RPL36A  | 4279200         | 2556300          | 2164600          |
| HNRNPU          | 1112200         | 3416000          | 0                |
| AMPD2           | 0               | 0                | 3342700          |
| PCBP1           | 0               | 0                | 4663400          |

Table S2 Continued

| Gene names              | Intensity 1-IgG | Intensity 2-Ctrl | Intensity 3-A549 |
|-------------------------|-----------------|------------------|------------------|
| ZNF609                  | 0               | 0                | 1228100          |
| ACTN4                   | 0               | 0                | 1966100          |
| ALDOA                   | 1238700         | 0                | 993470           |
| S100A8                  | 585330          | 2702600          | 2079900          |
| SLC25A5;SLC25A6;SLC25A4 | 1366700         | 6766400          | 2004100          |
| S100A9                  | 1507300         | 0                | 4454500          |
| ANXA2;ANXA2P2           | 0               | 0                | 0                |
| RPS17                   | 0               | 636620           | 2287900          |
| ALOX5                   | 0               | 0                | 3020100          |
| HSPD1                   | 881190          | 0                | 720100           |
| RPS2                    | 2338800         | 0                | 1186800          |
| FBL                     | 0               | 1177300          | 0                |
| SFPQ                    | 2179400         | 585550           | 0                |
| RPS3                    | 0               | 1866400          | 1129100          |
| ATP5A1                  | 0               | 980930           | 1992400          |
| CORO1A                  | 3742200         | 979480           | 0                |
| FUS;TAF15               | 1962100         | 0                | 1393000          |
| GLRX                    | 3046300         | 0                | 0                |
| CAPZB                   | 1132500         | 0                | 3325500          |
| ATP5O                   | 0               | 1114600          | 1309700          |
| RPL34                   | 0               | 0                | 852450           |
| CAPZA1;CAPZA2           | 3815600         | 0                | 5767800          |
| ATP5EP2;ATP5E           | 1535400         | 2733200          | 2151100          |
| EIF4A1;EIF4A2           | 648330          | 1037200          | 2291100          |
| RPL26;RPL26L1           | 1009100         | 1326100          | 0                |
| RPS7                    | 0               | 597080           | 602730           |
| RPL7A                   | 0               | 0                | 1802800          |
| RAN                     | 2128100         | 0                | 1213300          |
| RPL23                   | 0               | 3015200          | 0                |
| RPS25                   | 1899000         | 0                | 6097800          |
| RPS26P11;RPS26          | 0               | 5751700          | 1450500          |
| FAU                     | 3278000         | 0                | 4486600          |
| UBE2I                   | 0               | 5292600          | 2315100          |
| FABP5                   | 0               | 0                | 6802500          |
| PKP1                    | 597640          | 0                | 0                |

Table S2 Continued

| Gene names          | Intensity 1-IgG | Intensity 2-Ctrl | Intensity 3-A549 |
|---------------------|-----------------|------------------|------------------|
| ALYREF              | 467430          | 0                | 444860           |
| H1FX                | 0               | 868160           | 1396700          |
| MBNL1               | 0               | 390820           | 4216000          |
| CCDC144CP;CCDC144A  | 2241600         | 0                | 0                |
| HMGB1P1;HMGB1       | 0               | 0                | 632160           |
| HMG4                | 1458300         | 0                | 0                |
| ARPC1B              | 0               | 0                | 1607000          |
| ARPC3               | 0               | 0                | 1628400          |
| IGKC                | 2787700         | 0                | 0                |
| IGHG1;IGHG3         | 0               | 0                | 2074900          |
| HBZ                 | 6195500         | 0                | 0                |
| ARG1                | 1581700         | 0                | 0                |
| HNRNPC              | 1923100         | 0                | 0                |
| RPSA                | 0               | 1270600          | 0                |
| HNRNPA1             | 854790          | 812750           | 0                |
| UQCRRFS1;UQCRRFS1P1 | 0               | 0                | 2212600          |
| U2AF1               | 0               | 0                | 427250           |
| G6PD                | 0               | 0                | 978970           |
| IMPDH2              | 0               | 0                | 0                |
| LCP1;PLS3           | 0               | 0                | 737900           |
| HSPA7;HSPA6         | 0               | 0                | 592020           |
| PFKL                | 0               | 0                | 322810           |
| PTBP1               | 605780          | 0                | 825150           |
| RPL10L;RPL10        | 0               | 0                | 1997400          |
| PRDX5               | 1232400         | 0                | 0                |
| PDIA3               | 629040          | 0                | 0                |
| RPL22               | 0               | 0                | 2405600          |
| TAGLN3;TAGLN2       | 0               | 524350           | 0                |
| MNDA                | 0               | 0                | 1553400          |
| RPS27               | 512580          | 0                | 3668000          |
| RPL21               | 2737000         | 0                | 2050300          |
| RPL14               | 0               | 900190           | 0                |
| NHP2L1              | 0               | 0                | 1790200          |
| ARPC4               | 0               | 0                | 1410100          |
| ACTR2               | 0               | 0                | 1338100          |

Table S2 Continued

| Gene names    | Intensity 1-IgG | Intensity 2-Ctrl | Intensity 3-A549 |
|---------------|-----------------|------------------|------------------|
| RPL37A        | 1641600         | 3471600          | 0                |
| RPL37         | 0               | 0                | 0                |
| CNBP          | 893320          | 0                | 0                |
| RPS24         | 0               | 1635000          | 0                |
| RPL39P5;RPL39 | 17361000        | 14246000         | 11903000         |
| RPS27A        | 1314600         | 0                | 1315600          |
| RPL38         | 3584400         | 4239400          | 0                |
| YBX1          | 0               | 0                | 2593400          |
| RPL24         | 2207700         | 0                | 0                |
| SRSF3         | 0               | 0                | 747280           |
| RPL18A        | 0               | 1692700          | 0                |
| SSBP1         | 2538300         | 0                | 0                |
| CLC           | 5357400         | 0                | 6014500          |
| ACACA         | 6749000         | 0                | 0                |
| PTPRK         | 0               | 0                | 0                |
| ELAVL1        | 1636600         | 1696500          | 0                |
| HP1BP3        | 1489700         | 0                | 0                |
| KSR2          | 24414000        | 0                | 0                |
| GSTA5         | 0               | 9124300          | 9774900          |
| TTC21B        | 7694400         | 0                | 0                |
| ABCA13        | 3771100         | 14851000         | 2479500          |
| WDFY3         | 0               | 0                | 0                |
| VPS8          | 0               | 1280700          | 0                |
| SREK1IP1      | 0               | 0                | 659760           |
| POMGNT2       | 0               | 1604800          | 0                |
| RP9           | 504670          | 0                | 0                |
| TTN           | 0               | 0                | 0                |
| INPP5D        | 0               | 0                | 1316900          |
| ISOC2         | 1362000         | 972770           | 0                |
| TTC28         | 0               | 0                | 1804600          |
| EFHD2         | 0               | 0                | 644470           |
| PARK7         | 0               | 0                | 1193200          |
| HSD17B10      | 860840          | 801910           | 0                |
| LIMD2         | 0               | 896770           | 0                |
| DNAH6         | 26480000        | 0                | 0                |

Table S2 Continued

| Gene names | Intensity 1-IgG | Intensity 2-Ctrl | Intensity 3-A549 |
|------------|-----------------|------------------|------------------|
| BOLA2      | 0               | 0                | 805580           |
| WNK1       | 0               | 0                | 1501400          |
| KIAA1551   | 0               | 0                | 0                |
| ASH1L      | 0               | 5106000          | 0                |
| THYN1      | 0               | 546070           | 0                |
| RAB22A     | 3560300         | 0                | 0                |
| SRRM2      | 0               | 537570           | 0                |
| CHTOP      | 609020          | 0                | 363530           |

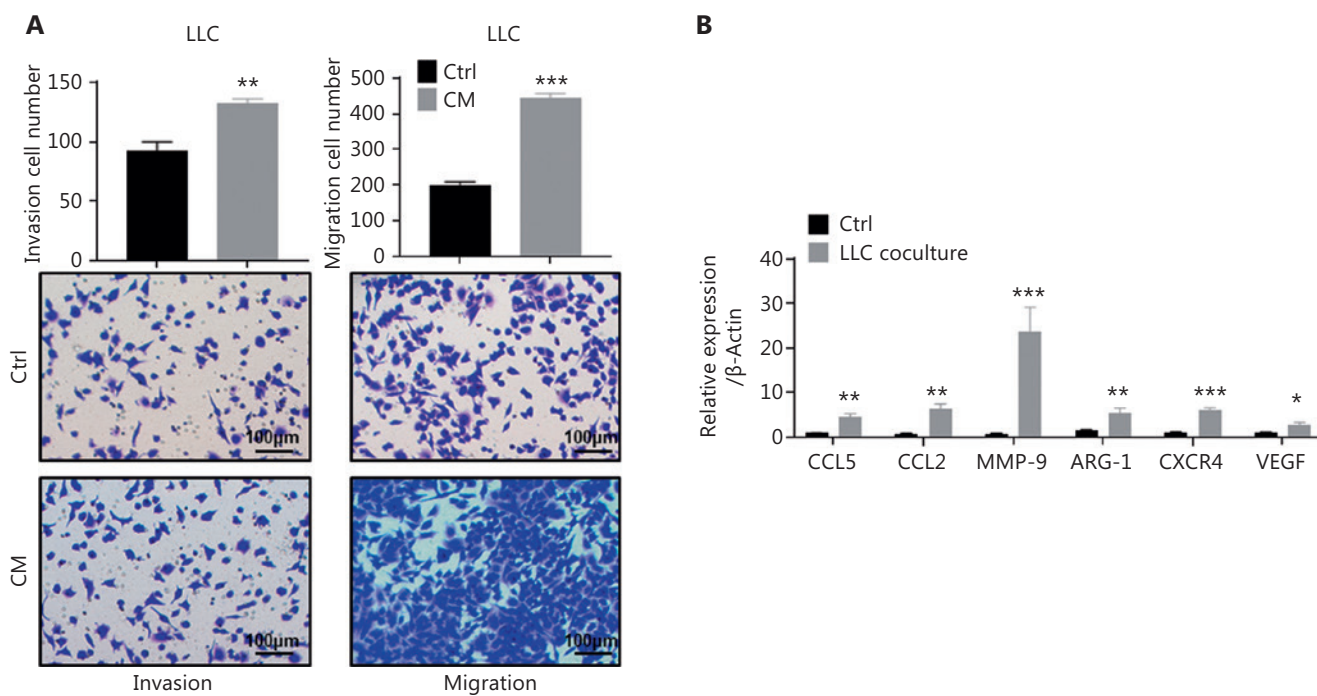

**Figure S1** (related to result 2). Cancer-educated neutrophils promote lung cancer cell invasion, migration, proliferation, and lung cancer growth. (A) BMN-activated productions (50 µL) were added to Transwell upper chamber to stimulated LLC cells. Then, the invasion and migration cell numbers were analyzed (CM, condition medium as neutrophil-activated productions). Scale bar: 100 µm. (B) *ccl5*, *ccl2*, *mmp-9*, *arg-1*, *cxcr4*, and *vegf* mRNA in BMNs co-cultured with LLC cells were measured by real-time PCR. All data are expressed as the mean ± SEM ( $n = 3-5$ ). \* $P < 0.05$ , \*\* $P < 0.01$ , \*\*\* $P < 0.001$ .



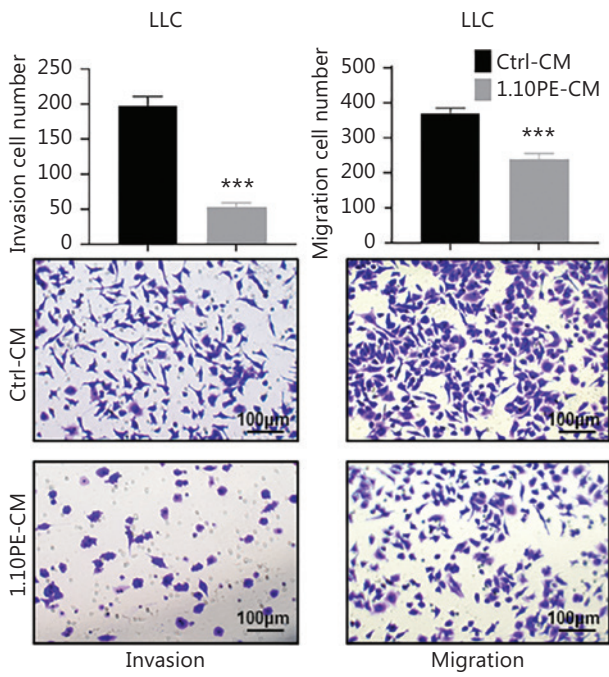

**Figure S2** (related to result 3). Neutrophil-released MMP-9 promotes lung cancer cell invasion, migration, and proliferation. 1.10PE (200 μM) was used during BMN activation. Then, the neutrophil-activated productions (Ctrl-CM, 50 μL) with or without 1.10PE (1.10PE-CM) were added to the Transwell upper chamber to stimulated LLC cells. Then, the invasion and migration cell numbers were analysis. Scale bar: 100 μm. All data are expressed as the mean ± SEM ( $n = 5$ ). \*\*\* $P < 0.001$ .

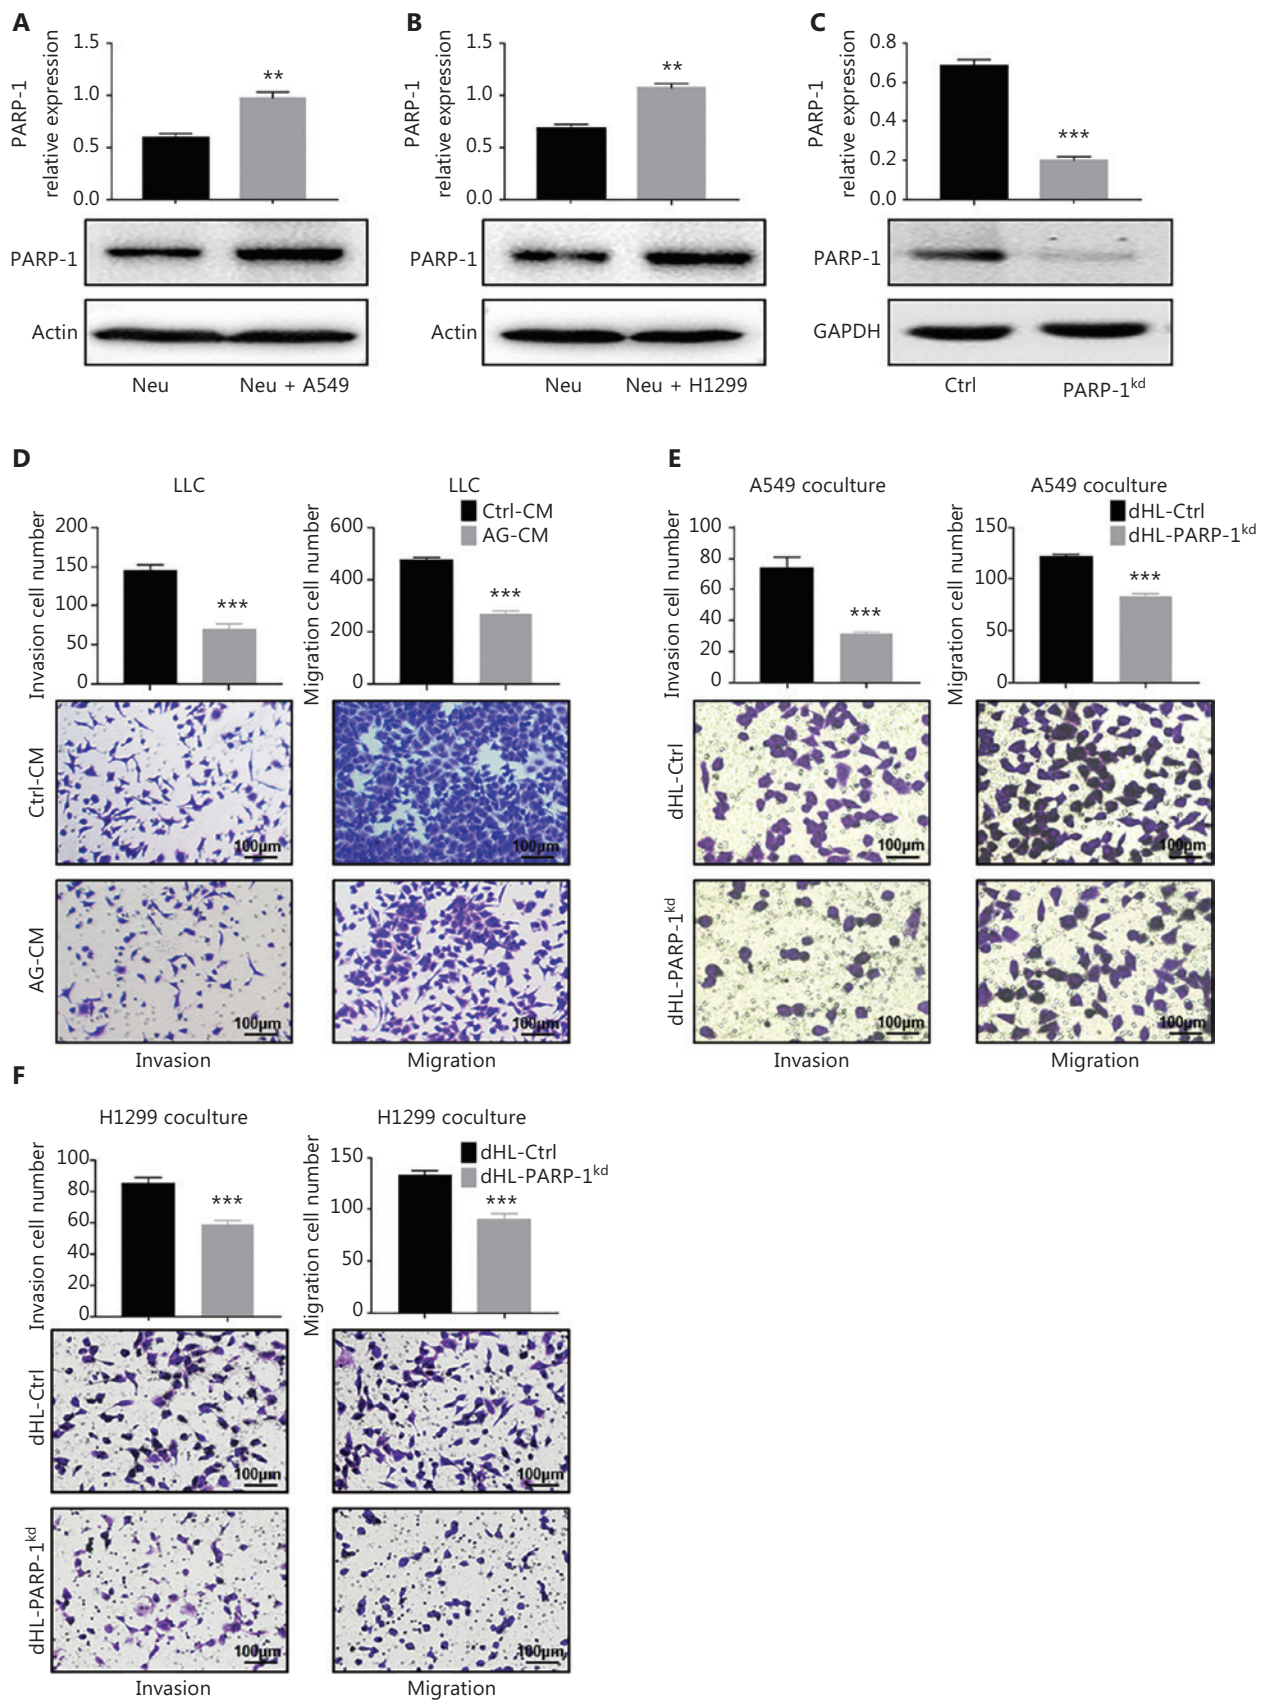

---

**Figure S3** (related to result 4). PARP-1 regulates MMP-9 expression and neutrophil-induced lung cancer cell invasion, migration, and proliferation. (A and B) Neutrophil differentiated from HL-60 cells were co-cultured with A549 (A) and H1299 (B) cells for 4 h. Then, PARP-1 expression was measured by western blot analysis in neutrophils. (C) PARP-1 was knocked down by shRNA in HL-60 cells. PARP-1 expression was measured by western blot analysis. (D) AG14361 (1  $\mu$ M) was used during BMN activation. Then, the neutrophil-activated productions (50  $\mu$ L) with or without AG14361 (AG) were added to the Transwell upper chamber to stimulated LLC cells. Then, the invasion and migration cell numbers were analyzed. (E and F) For the co-culture Transwell system, the normal (dHL-Ctrl) and PARP-1 knockdown neutrophils (dHL-PARP-1<sup>kd</sup>,  $6 \times 10^6$  in 600  $\mu$ L of serum-free medium) were pre-seeded in the lower chamber. Then, A549 (E) or H1299 (F) cells were seeded in the upper chamber. The invasion and migration cell numbers were analyzed. Scale bar: 100  $\mu$ m. All data are expressed as the mean  $\pm$  SEM ( $n = 3-5$ ). \*\* $P < 0.01$ , \*\*\* $P < 0.001$ .

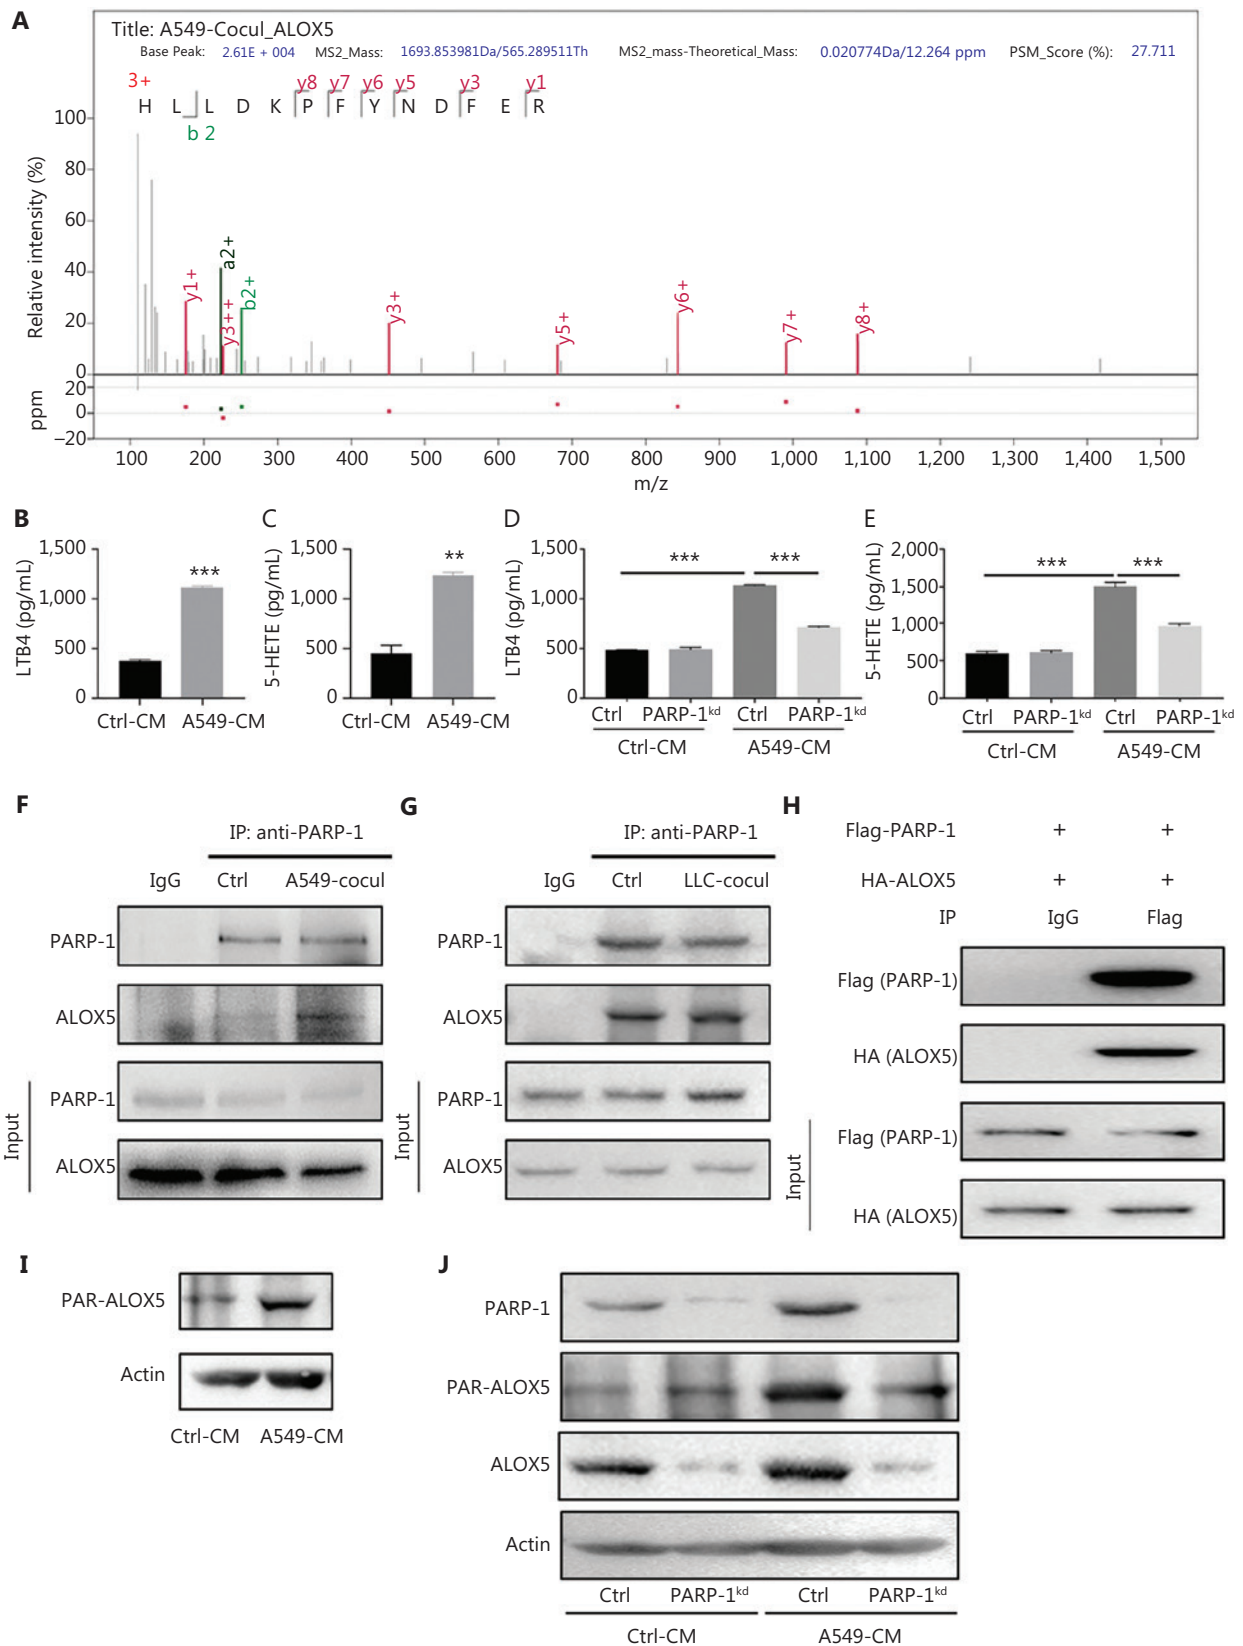

Figure S4 Continued

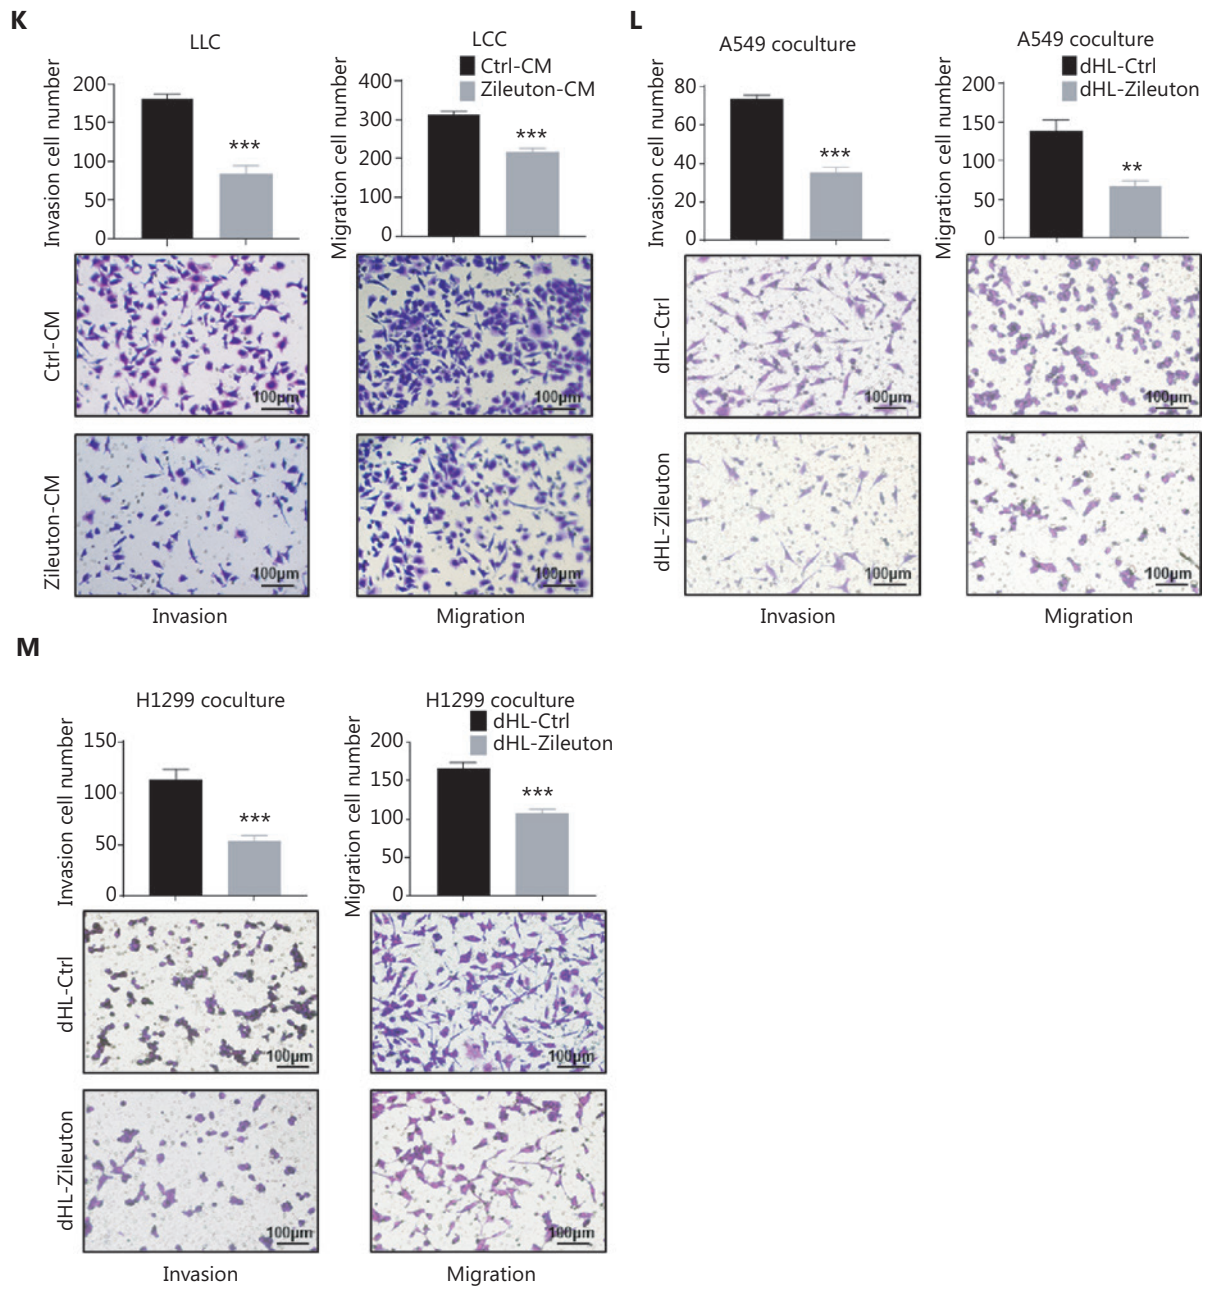

**Figure S4** (related to result 5). PARP-1 binding to ALOX5 mediates MMP-9 expression in neutrophils. (A) IP/MS figure of ALOX5. (B and C) HL-60-differentiated neutrophils were co-cultured with A549 cells for 4 h. LTB4 (B) and 5-HETE (C) were measured by ELISA. (D and E) The normal and PARP-1 knockdown neutrophils were stimulated with control and A549-CM for 4 h. LTB4 (D) and 5-HETE (E) were measured by ELISA. (F) HL-60-differentiated neutrophils were co-cultured with A549 cells for 4 h. Co-immunoprecipitation of PARP-1 with ALOX5 in neutrophils was performed. (G) BMNs were co-cultured with LLC cells for 4 h. Co-immunoprecipitation of PARP-1 with ALOX5 in neutrophils was performed. (H) Flag-PARP-1 and HA-ALOX5 plasmids were transfected into 293T cells. After 48 h, ALOX5 was immunoprecipitated using anti-Flag antibody. (I) HL-60-differentiated neutrophils were co-cultured with A549 cells for 4 h. PARylation of ALOX5 was examined from immunoprecipitation by western blot analysis. (J) The normal and PARP-1 knockdown neutrophils were stimulated with control and A549-CM for 4 h. PARylation of ALOX5 was examined from immunoprecipitation by western blot analysis. (K) Zileuton was used during BMN activation. Then, the neutrophil-activated productions (50  $\mu$ L) with or without Zileuton were added to the Transwell upper chamber to stimulated LLC cells. Then, the invasion and migration cell numbers were analyzed. (L and M) For the co-culture Transwell system, the neutrophils differentiated from HL-60 cells (dHL-Ctrl,  $6 \times 10^6$  in 600  $\mu$ L of serum-free medium) were pre-seeded in the lower chamber with or without Zileuton (50  $\mu$ M, dHL-Zileuton). Then, A549 (L) or H1299 (M) cells were seeded in the upper chamber. The invasion and migration cell numbers were analyzed. Scale bar: 100  $\mu$ m. All data are expressed as the mean  $\pm$  SEM ( $n = 5$ ). \*\* $P < 0.01$ , \*\*\* $P < 0.001$ .
